# Supplementary material for: Factors Associated with Uptake of Hiv Index Testing Among Plhiv and Their Sexual Partners in Tanga Region, Tanzania. A Cross-Sectional Study
Source: Research Square preprint supplement (doi:10.21203/rs.3.rs-7180477/v1), 2025-09-03
Supplement: Supplementary file 1 [file 62c2727a884dcd2a7358b6da.docx]

**APPENDIX C: Questionnaire for Index Clients (English version)**

**Socio-demographic characteristics of participants**

1. How Old are you ____________

2. What is your Gender? (Tick one) a. Male _____ b. Female ______

3. What is you Marital Status:

a) Married/cohabiting b) Single c) Separated/Divorced d) Widowed

4. What is the highest level of Education you have attained?

a) No formal education b).Primary incomplete c) primary complete d) Secondary O level e) Secondary A level f) Higher education (College)_____________________________________________________________

5. What do you do to earn a living (Occupation):

a) Not employed b) Employed by the Government c) Employed by Private company d) Petty trader, e) Business person ____________________________________________________________

6. When were you diagnosed with HIV?___________________________

7. For how long (Years/months) have you been attending the CTC?

8. Have you had any sexual partner within the past 2 years?

1. Yes
2. No

9. If Yes, how many sexual partners have you had in the past 2 years?

10. Have you disclosed your HIV status to your sexual partner/s ________

11. If Yes, to how many of your previous sexual partners have you disclosed your HIV Status? _____

**Awareness, uptake and challenges in index testing services – Clients’ perspective**

12. Have you ever heard of Partner counselling/index testing services?

- Yes
- No

13. If Yes, what was the source of information about index partner/children testing?

1. CTC staff
2. Friends
3. Other Sources (Mention) __________________________________

14. Have you informed any of your sexual partners about counselling and HIV testing?

15. If No why have you not informed your sexual partners about this service?

__________________________________________________________________________________________________________________________________________________________

16. If Yes, how many of your sexual partners have you provided information for counselling and HIV testing? __________

17. Of the sexual partners you provided their information, how many were already known to be HIV positive? _________

18. Of the sexual partners you provided their information; how many have been reached and tested? ______

19. Of those already tested, how many turned to be HIV Positive and got linked to care? ______

20. Do you feel that there is still stigma and discrimination against PLHIV? (Yes/No)____________

21. Have you ever experienced HIV stigma and or discrimination? ____________

22. If Yes, where did you experience it?

1. At home (My family) b) At the Health facility (Health care providers) c) from my sexual partners d) Other Specify………

23. From your point of view, why is it important to provide counselling and testing for your partner(s)/children?

____________________________________________________________________________________________________________________________________________________________________________________________________________________________________________________________________________________________________________________

24. What do you think are the major obstacles for you to elicit more of your sexual partners? ___________________________________________________________________________________________________________________________________________________________________________________________________________________________________________________________________________________________________________________________________________________________________

25. What do you think are the major obstacles for reaching those you elicited for HIV testing?

____________________________________________________________________________________________________________________________________________________________________________________________________________________________________________________________________________________________________________________

Thank you for your cooperation

**APPENDIX E: Structured Questionnaire for HCPs (English version)**

**Socio-demographic characteristics of participants**

1. What is your Gender? __________

2. What is the highest level of Education attained?

a) No formal education b).Primary incomplete c) primary complete d) Secondary O level e) Secondary A level f) Higher education (College)_____________________________________________________________

3. What is your Job Title?: _______________________________________________

4. How many Years of experience do you have at Work?______________________

5. What do you understand by the term Index Testing/Partner Counselling and referral services?

____________________________________________________________________________________________________________________________________________________________________________________________________________________________________________________________________________________________________________________

6. Have you ever been trained on PCRCs/Index testing by either on job training or through a formal classroom training? Yes ______ No ______

7. For how long have you been working as Index Testing Service provider? _______________

8. From your experience, what is the average Index:Partner elicitation ratio that you have ever managed to attain? _________

9. What is the average index testing coverage among the clients you have managed to elicit for the past 3 months? __________

10. From your experience, what are the major obstacles/hindrances encountered during client counselling and elicitation? _________________________________________________________________________________________________________________________________________________________________________________________________________________________________________________________________________________________________________________________________________________________________________________________________

11. What could be the major challenges encountered during tracking of elicited clients for counselling and testing? ____________________________________________________________________________________________________________________________________________________________________________________________________________________________________________________________________________________________________________________

12. From your experience, what do you suggest the facility should do to improve index testing services to reach more people? ____________________________________________________________________________________________________________________________________________________________________________________________________________________________________________________________________________________________________________________

13. What do you suggest that the program and the government should do to improve index testing services?

____________________________________________________________________________________________________________________________________________________________________________________________________________________________________________________________________________________________________________________

Thank you for your cooperation
